# Supplementary material
Source: PubMed Central journal article supplement (PMC549441)

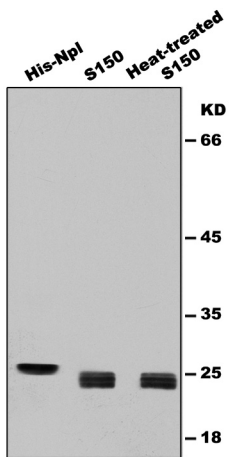

Supplement: pnas_102_8_2778__1.pdf [file pnas_102_8_2778__1.pdf]

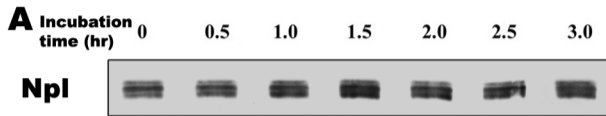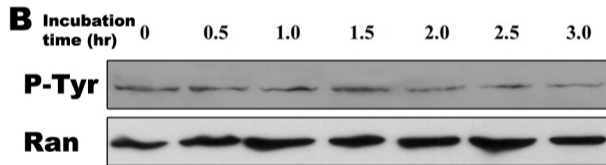

Supplement: pnas_102_8_2778__2.pdf [file pnas_102_8_2778__2.pdf]
